# Supplementary material for: Looping of upstream cis-regulatory elements is required for CFTR expression in human airway epithelial cells
Source: PubMed Central journal article supplement — Nucleic Acids Res. 2020 Feb 25;48(7):3513–24. doi: 10.1093/nar/gkaa089 (PMC7144911; doi:10.1093/nar/gkaa089), 2020-02-25
Supplement: gkaa089_supplemental_file.pdf [file gkaa089_supplemental_file.pdf]

**A**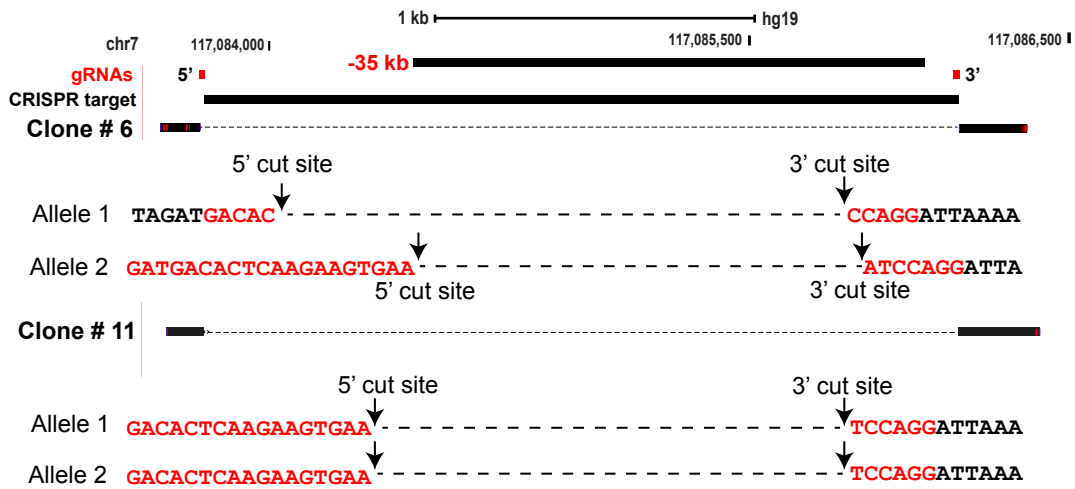**B**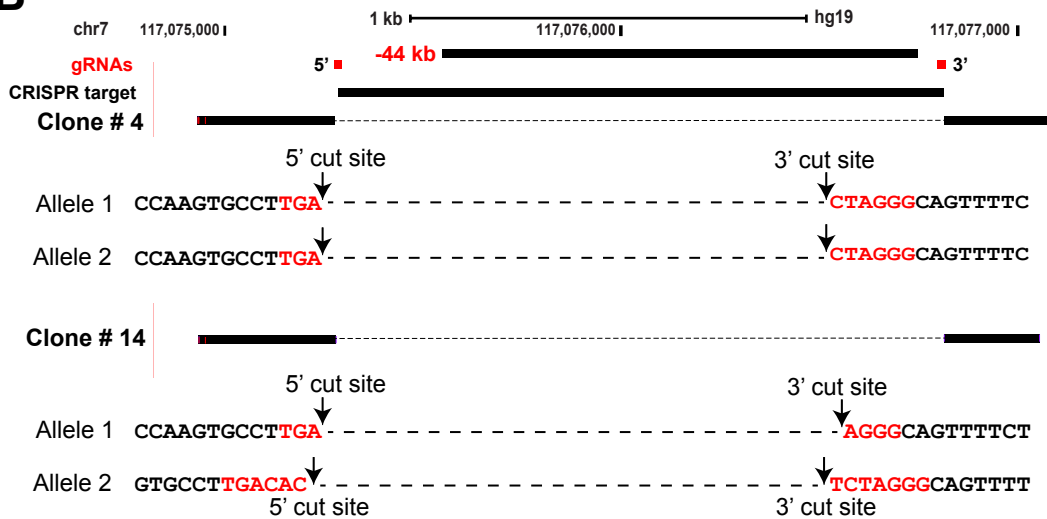

**Supplementary Figure S1: Design and validation of CRISPR/Cas9 mediated deletions of -35 kb and -44 kb regulatory elements.** UCSC genome browser graphic showing the schematic for the design of the CRISPR/Cas9 deletion of -35 kb CRE (A) and -44 kb CRE (B). The gRNAs used (red) and the target regions are shown above the sequences of two deletion clones for each CRE. The exact positions of the cuts in the 2 alleles are indicated by black arrows and were validated by sequencing from the external primers (Suppl. Table S1).

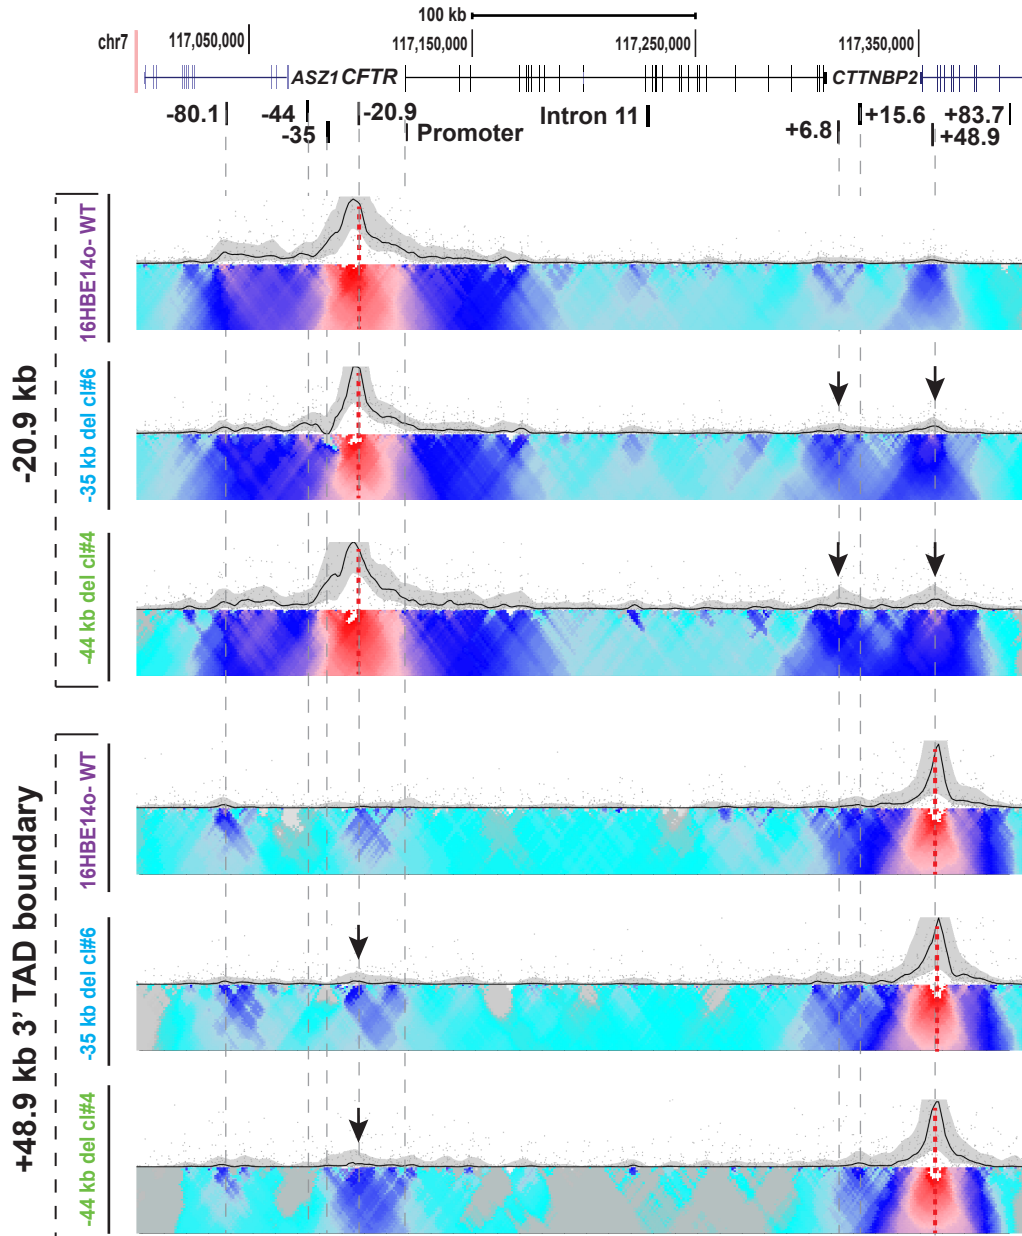

**Supplementary Figure S2:** Deletion of the -35 kb or the -44 kb CRE from the *CFTR* locus has a major impact on locus architecture. 4C-seq interaction profiles of the same WT,  $\Delta$ -35 kb (Clone #6 and  $\Delta$ -44 kb (Clone #4) 16HBE14o- clones shown in Fig.4, using viewpoints at the -20.9 kb and the +48.9 kb 3' TAD boundary. Data from a single representative clone are shown, and were consistent with an independent replica clone for both deletions.

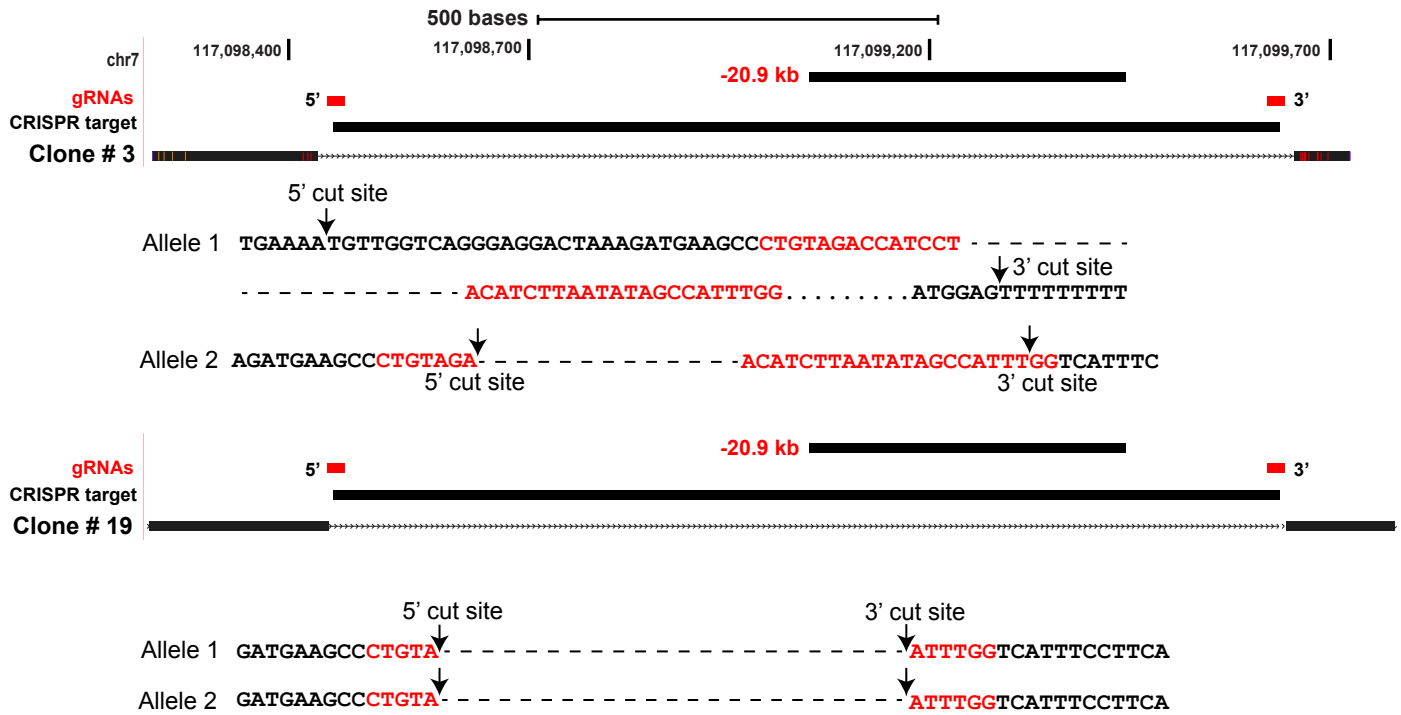

**Supplementary Figure S3:** Design and validation of CRISPR/Cas9 mediated -20.9 kb CRE deletion in 16HBE14o-. UCSC genome browser graphic showing the schematic for the design of the CRISPR/Cas9 deletion of -20.9 CRE. The gRNAs used (red) and the target regions are shown above the sequences of two deletion clones. The exact positions of the cuts in the 2 alleles are indicated by black arrows and were validated by sequencing using the external primers shown in Suppl. Table S1.

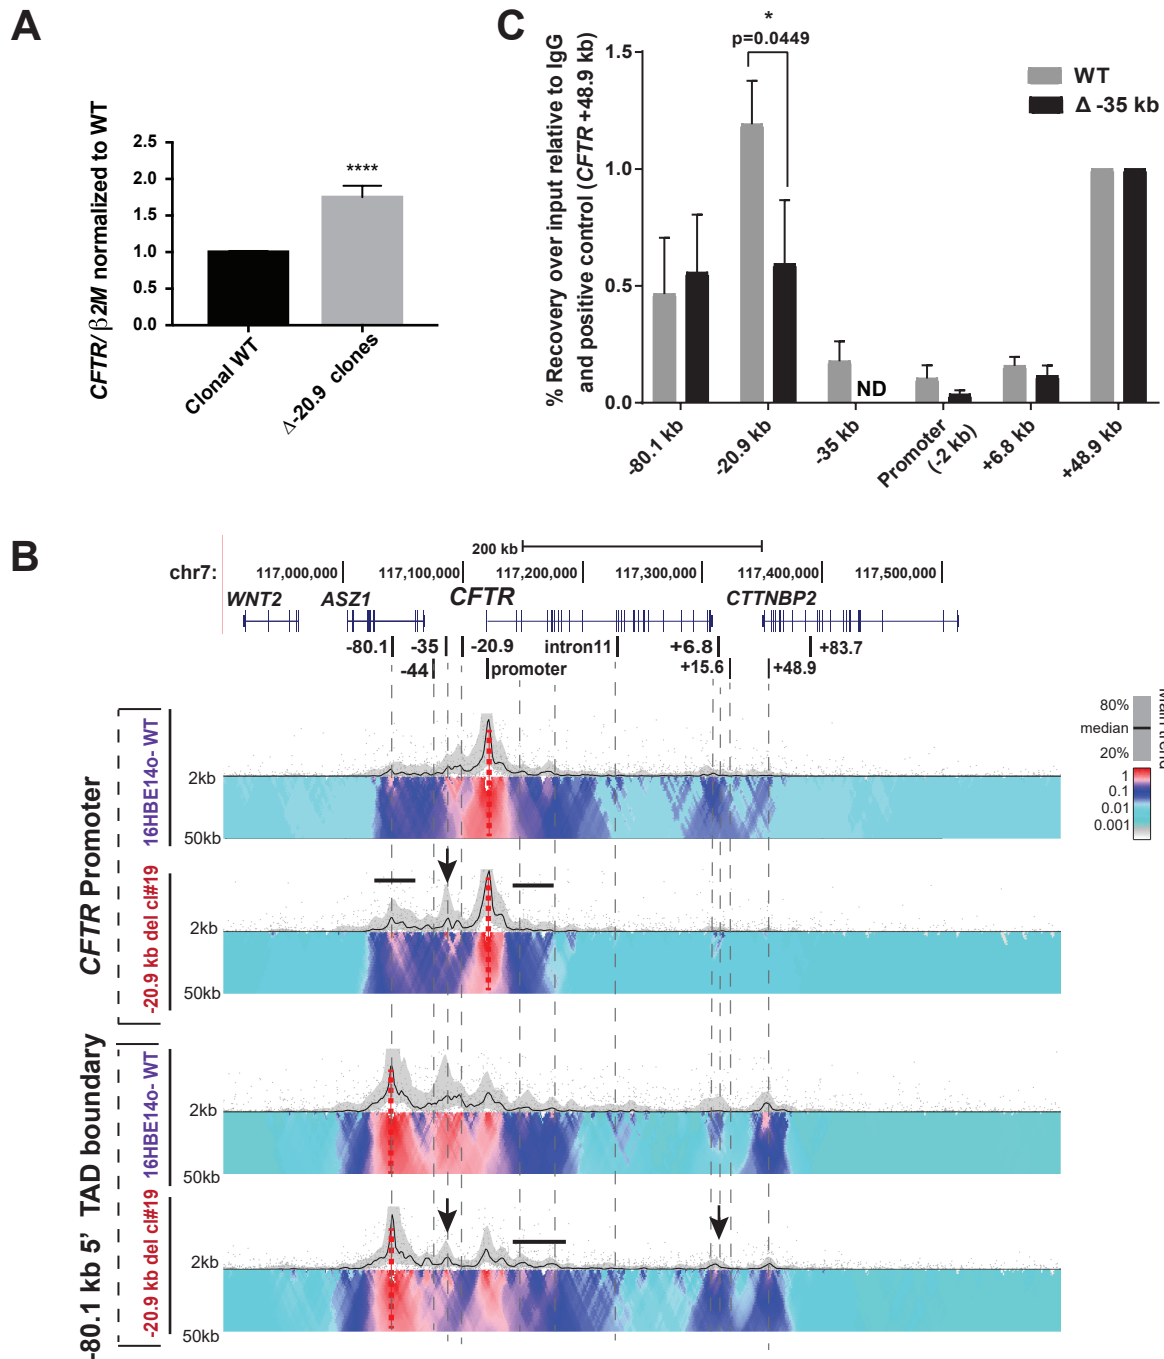

**Supplementary Figure S4: Removal of the -20.9 kb CRE alters *CFTR* gene expression and chromatin conformation in 16HBE14o- cells.** A) *CFTR* gene expression measured by RT-qPCR in two Δ-20.9 kb clones compared to 2 non-targeted WT clones from the same experiment. Results are the average of 3 independent experiments. Error bars represent S.E.M. B) 4C-seq interaction profiles of Δ-20.9 kb clone #19 with viewpoints at *CFTR* promoter (top) and the -80.1 kb 5' TAD boundary (below). Data from a single representative clone are shown, and were consistent in a replica clone. C) Deletion of the -35kb CRE decreases CTCF occupancy at the adjacent -20.9 kb insulator element. CTCF ChIP-qPCR analysis in a non-targeted WT (grey) and -35 kb deletion clone (# 6, black) in 16HBE14o- cells. CTCF occupancy was assayed at the -80.1 kb, -35 kb, -20.9 kb, +6.8 kb and +48.9 kb binding sites and the promoter (-2 kb). The graph shows % input values normalized to IgG and relative to CTCF occupancy at the +48.9 kb invariant site. Error bars represent S.E.M., n=3.

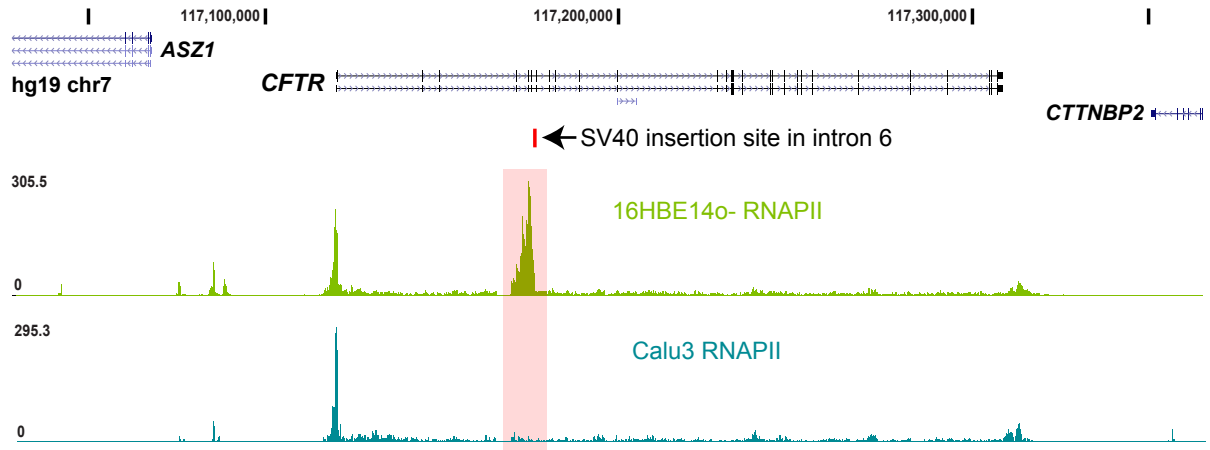

**Supplementary Figure S5: The impact of SV40 integration on RNAPII recruitment.** The UCSC genome browser image defines the insertion site of the SV40 genome in intron 6 of *CFTR* gene [35]. ChIP-seq shows RNAPII occupancy adjacent to this insertion in 16HBE14o- cells (olive green), but not in Calu3 cells (teal). Both RNAPII ChIP-seq experiments were performed in 2 replicates and data are shown as IDR plots.

**A**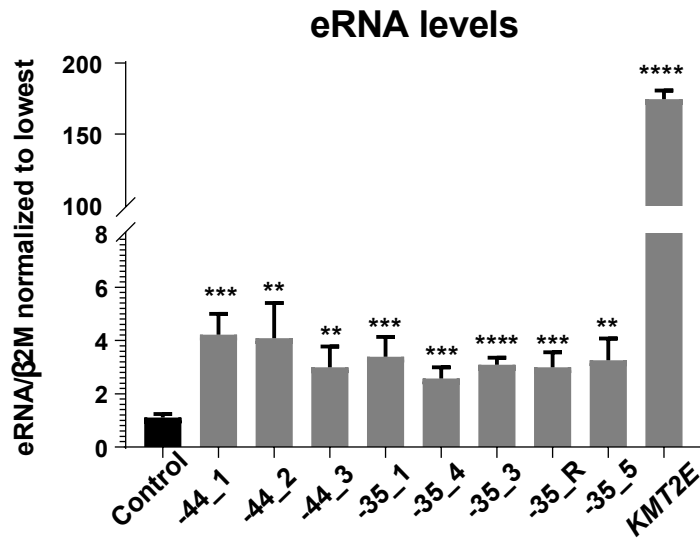**B**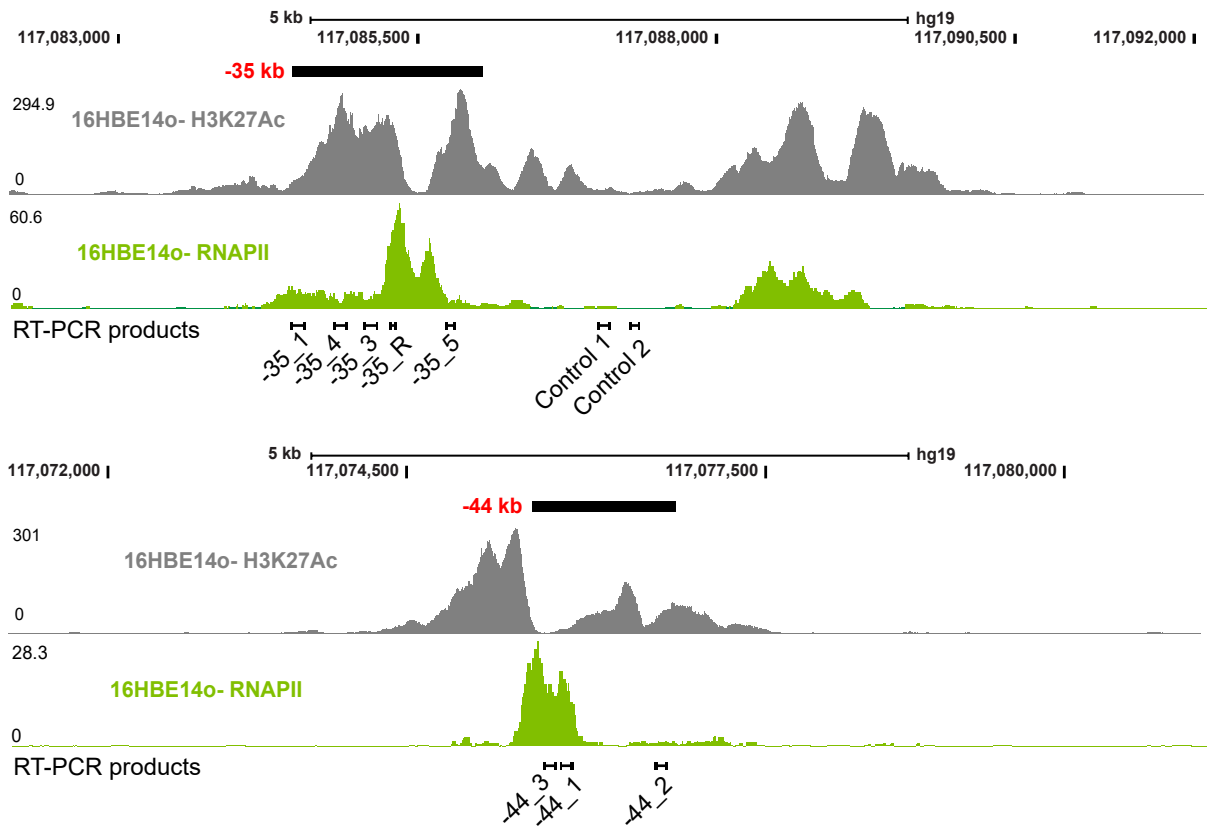

**Supplementary Figure S6: The -35 and -44 kb CREs may produce low abundance eRNAs.** A) qRT-PCR of eRNAs generated from the -44 and -35 kb CREs normalized to the lowest values (an average of control 1 and control 2, which showed almost negligible eRNA levels), set to 1. The ncRNA upstream of *KMT2E* gene was used as the positive control. The error bars indicate the S.E.M and n=4. B) UCSC genome browser images showing the location of the qRT-PCR products below the 16HBE14o- H3K27Ac and RNAPII ChIP-seq data for -35 kb (above) and -44 kb (below).

## Supplementary Tables

**Supplementary Table S1:** List of gRNA sequences and PCR primers used for the generation and validation of -35 kb, -44 kb and -20.9 kb CRISPR/Cas9 deletion clones in 16HBE14o-.

| Name                                 | Sequence (5'-3')         |
|--------------------------------------|--------------------------|
| -35 kb 5' gRNA                       | GACTCAAGAAGTGAACAG       |
| -35 kb 3' gRNA                       | AACAAATTACATGTACATCC     |
| -44 kb 5' gRNA                       | AAGTGTTTAGAAAAGTGTCA     |
| -44 kb 3' gRNA                       | GATATCAGACAACAAGTCTA     |
| -35 kb validation PCR Fwd External   | AGGTGAAAAGGCGAAGAAGAAA   |
| -35 kb validation PCR Rev External   | CTGTAACCAACAAGGACCTC     |
| -35 kb validation PCR Fwd Internal   | CAACTGCTCACGTAAATGGGTA   |
| -44 kb validation PCR Fwd External   | CTATCCAGGAGGGCAGGAAAC    |
| -44 kb validation PCR Rev External   | GTCTCCTACATCATCCTTTTCA   |
| -44 kb validation PCR Rev Internal   | ACTCAGGAAGTAGGAAGAAGAGC  |
| -20.9 kb 5' gRNA                     | Yang <i>et al</i> , 2016 |
| -20.9 kb 3' gRNA                     | Yang <i>et al</i> , 2016 |
| -20.9 kb validation PCR Fwd External | GCTCAACGTAGGTTTGGC       |
| -20.9 kb validation PCR Rev External | ACAGGCAAAAATCCAGGTTG     |
| -20.9 kb validation PCR Fwd Internal | CCGGGATGTTGTTTGAAGCTT    |

**Supplementary Table S2:** Primers for ChIP-qPCR and RT-qPCR

| Taqman RT-qPCR primer sets | Sequences                                                        |
|----------------------------|------------------------------------------------------------------|
| CFTR exon 5 F              | AGCTGTCAAGCCGTGTTCTAGATA                                         |
| CFTR exon 6 R              | ATGAGGAGTGCCACTTGCAAA                                            |
| CFTR exon 5/6 probe        | CACACGAAATGTGCCAATGCAAGTCCTT                                     |
| B2M F                      | AAGTGGGATCGAGACATGTAAG                                           |
| B2M R                      | GCAAGCAAGCAGAATTTGGA                                             |
| B2M probe                  | 5- /56-JOEN/TCA TGG AGG /ZEN/TTT GAA GAT<br>GCC GCA /3IABkFQ/ -3 |

| SYBR RT-qPCR primer sets | Sequences               |
|--------------------------|-------------------------|
| -44 kb_1 F               | TGCTTGGTTCGCTGATGACA    |
| -44 kb_1 R               | TCAGGAACTAGGAAGAAGAGCC  |
| -44 kb_2 F               | GGGAGCAAGTGTAGAATCAGGAA |
| -44 kb_2 R               | TCAACTGGGGCTGGCTAAAA    |
| -44 kb_3 F               | AGTCACAAGCTTTATTCTGGC   |
| -44 kb_3 R               | GGCATTCTGACCCACTCCAG    |
| -35 kb_1 F               | AGATGTCACCCCTAGACCTGT   |
| -35 kb_1 R               | AAGAGGGTTGATGGTGTGCT    |
| -35 kb_3 F               | CACATTTATCAGCACCAGCC    |
| -35 kb_3 R               | AGTTCTCTGCTCTTGGGTTT    |
| -35 kb_4 F               | CTTCCAGCAGAGCATGACACA   |

|                     |                          |
|---------------------|--------------------------|
| -35 kb_4 R          | CCACCACTTGGGCTTTTTTTCAC  |
| -35 kb_5 F          | GAAGTGCCTCAACTGCTCAC     |
| -35 kb_5 R          | TGTAAGAACAACCGAACCCGA    |
| -35 kb RNAPII F     | ATCTACCTTACCCTGCTGTCCATT |
| -35 kb RNAPII R     | TCTGAATTATCAGCCCACAGTCA  |
| KMT2E F             | CCAGCTATGACCAGGGTTCAC    |
| KMT2E R             | TCTGCATGGTGGGTTCAGTAT    |
| -35_6 F (Control 1) | AGAGAGTTGAACTTTGGTATGGC  |
| -35_6 R (Control 1) | GTAGGGAAAGCCTACACTCTCA   |
| -35_7 F (Control 2) | GCCATCAGTATCATCCGTTTC    |
| -35_7 R (Control 2) | GTAAAGGGGAATGGGGAGTT     |

| <b>ChIP-qPCR primer sets</b> | <b>Sequences</b>                 |
|------------------------------|----------------------------------|
| -80.1 kb F                   | GGGCATTCAAAGAAAAGCAGAAAGC        |
| -80.1 kb R                   | ACCCAGTACAGAGACGTGACA            |
| -44 kb F                     | AGTGAGATTAGTTGTCTCTTTTGGAGATAA   |
| -44 kb R                     | CCCTTGACTATTTTGTGCACATG          |
| -35 kb F                     | ATCTACCTTACCCTGCTGTCCATT         |
| -35 kb R                     | TCTGAATTATCAGCCCACAGTCA          |
| -20.9 kb F                   | CCGGGATGTTGTTTGAAGCTT            |
| -20.9 kb R                   | TTTAAATAGTTGAATAGAGGACGAGATACTTT |
| Promoter -4 kb F             | TTCCACAGTACAAGGGCAACC            |
| Promoter -4 kb R             | CAGATTAAGTTAGGGTCTCTCTACCTCAG    |
| Promoter -3.4 kb F           | AGAAGCACCCAGCACATT               |
| Promoter -3.4 kb R           | AAGAGCGAGGATGAGTAGGA             |
| Promoter -2 kb F             | TTGAACAATTTTCTGGTGGATAAGTC       |
| Promoter -2 kb R             | ATGCACTAATTGCGACATGATATTC        |
| Intron 1 F                   | TCATTGTCAACTGTCAGGTAGCAA         |
| Intron 1 R                   | CAGAGTTAGGATTCCAGCCAGG           |
| Intron 10 F                  | TGCTTTATTGAATGGCATTACCTCTA       |
| Intron 10 R                  | AGATGCTTGTGGTAAGGGAGGAG          |
| Intron 23 F                  | CCCTATGGTTTAGTCACAAGGAAGTT       |
| Intron 23 R                  | GGCTCAAAAGCCTGAACAGAA            |
| +6.8 kb F                    | TCTTCTTTCCATTACCTTTGTC           |
| +6.8 kb R                    | TTTTGGTTTCATTTATCAGCACATC        |
| 11p13 F                      | TCCTTCCAGGTTTTGGCTCC             |
| 11p13 R                      | GCCCCAGATCAGGAGAGAGA             |
| M6PR F                       | CGCCTTTTCTGGTTGCCTTT             |
| M6PR R                       | ACCCTTCTCACTCGAACCTT             |
| +48.9 F                      | GGCATCAGCCAGTCAAGGTT             |
| +48.9 R                      | AGCAGAGGGCAAAGTGGTACTT           |



### Supplementary Table S3

| Luciferase mutagenesis primer | Sequence                                                      |
|-------------------------------|---------------------------------------------------------------|
| pZL350 – CEBP $\beta$ mutant  | cccacaggaatgctctggagcacaatTCTCGAGcagaattagccctacctgaagcaagtgg |

**Supplementary Table S4:** Restriction enzyme pairs and primer sequences used for 4C library generation.

| Viewpoint                   | Primary enzyme | Secondary enzyme | Reading primer                                                                           | Non-reading primer                                      |
|-----------------------------|----------------|------------------|------------------------------------------------------------------------------------------|---------------------------------------------------------|
| CFTR promoter<br>No barcode | NlaIII         | Csp6I            | AATGATACGGCGACCACCGAA<br>CACTCTTCCCTACACGACGCT<br>CTTCCGATCTGCACTTACTAT<br>ATGCAGGCATG   | CAAGCAGAAGACGG<br>CATACGATGAAGTG<br>TTCTTTGGATATTG<br>C |
| CFTR promoter<br>AT         | NlaIII         | Csp6I            | AATGATACGGCGACCACCGAA<br>CACTCTTCCCTACACGACGCT<br>CTTCCGATCTATGCACTTACT<br>ATATGCAGGCATG | CAAGCAGAAGACGG<br>CATACGATGAAGTG<br>TTCTTTGGATATTG<br>C |
| CFTR promoter<br>GA         | NlaIII         | Csp6I            | AATGATACGGCGACCACCGAA<br>CACTCTTCCCTACACGACGCT<br>CTTCCGATCTGAGCACTTACT<br>ATATGCAGGCATG | CAAGCAGAAGACGG<br>CATACGATGAAGTG<br>TTCTTTGGATATTG<br>C |
| CFTR promoter<br>GC         | NlaIII         | Csp6I            | AATGATACGGCGACCACCGAA<br>CACTCTTCCCTACACGACGCT<br>CTTCCGATCTGCGCACTTACT<br>ATATGCAGGCATG | CAAGCAGAAGACGG<br>CATACGATGAAGTG<br>TTCTTTGGATATTG<br>C |
| -80.1 kb<br>No barcode      | NlaIII         | Csp6I            | AATGATACGGCGACCACCGAA<br>CACTCTTCCCTACACGACGCT<br>CTTCCGATCTACTGAGAACTT<br>ACAGGGCAGTC   | CAAGCAGAAGACGG<br>CATACGACTGGTAG<br>CTTTTGGTTGAATG      |
| -80.1 kb<br>GA              | NlaIII         | Csp6I            | AATGATACGGCGACCACCGAA<br>CACTCTTCCCTACACGACGCT<br>CTTCCGATCTGAACTGAGAAC<br>TTACAGGGCAGTC | CAAGCAGAAGACGG<br>CATACGACTGGTAG<br>CTTTTGGTTGAATG      |
| -80.1 kb<br>AT              | NlaIII         | Csp6I            | AATGATACGGCGACCACCGAA<br>CACTCTTCCCTACACGACGCT<br>CTTCCGATCTATACTGAGAAC<br>TTACAGGGCAGTC | CAAGCAGAAGACGG<br>CATACGACTGGTAG<br>CTTTTGGTTGAATG      |
| -80.1 kb<br>AG              | NlaIII         | Csp6I            | AATGATACGGCGACCACCGAA<br>CACTCTTCCCTACACGACGCT<br>CTTCCGATCTAGACTGAGAAC<br>TTACAGGGCAGTC | CAAGCAGAAGACGG<br>CATACGACTGGTAG<br>CTTTTGGTTGAATG      |
| -20.9<br>No barcode         | NlaIII         | DpnII            | AATGATACGGCGACCACCGAA<br>CACTCTTCCCTACACGACGCT<br>CTTCCGATCTTTAACAAAGTT                  | CAAGCAGAAGACGG<br>CATACGACAAAGTG<br>AGCTATTTGTTTT       |

|                        |        |       | TAGGTAAATGACCA                                                                             | CTC                                                      |
|------------------------|--------|-------|--------------------------------------------------------------------------------------------|----------------------------------------------------------|
| -20.9 kb<br>AT         | NlaIII | DpnII | AATGATACGGCGACCACCGAA<br>CACTCTTCCCTACACGACGCT<br>CTTCCGATCTATTTAACAAG<br>TTTAGGTAAATGACCA | CAAGCAGAAGACGG<br>CATACGACAAAGTG<br>AGCTATTTGTTTT<br>CTC |
| +48.9 kb<br>No barcode | NlaIII | DpnII | AATGATACGGCGACCACCGAA<br>CACTCTTCCCTACACGACGCT<br>CTTCCGATCTGAGTGAGCTTG<br>AAAGCCATG       | CAAGCAGAAGACGG<br>CATACGATGGAACA<br>TCGTCAGTGGAAG        |
| +48.9 kb<br>AT         | NlaIII | DpnII | AATGATACGGCGACCACCGAA<br>CACTCTTCCCTACACGACGCT<br>CTTCCGATCTATGAGTGAGCT<br>TGAAAGCCATG     | CAAGCAGAAGACGG<br>CATACGATGGAACA<br>TCGTCAGTGGAAG        |
